# Supplementary material for: Bioactive and Elastic Emulsion Electrospun DegraPol Tubes Delivering IGF-1 for Tendon Rupture Repair
Source: MDPI journal article supplement (doi:10.3390/ijms241210272), 2023-06-17
Supplement: s1 [file s1]

# Bioactive and Elastic Emulsion Electrospun DegraPol Tubes Delivering IGF-1 for Tendon Rupture Repair

Julia Rieber <sup>1</sup>, Gabriella Meier-Bürgisser <sup>1</sup>, Iris Miescher <sup>1</sup>, Franz E. Weber <sup>2</sup>, Petra Wolint <sup>1</sup>, Yao Yang <sup>3</sup>, Esteban Ongini <sup>4</sup>, Athanasios Milionis <sup>5</sup>, Jess G. Snedeker <sup>4</sup>, Maurizio Calcagni <sup>1</sup> and Johanna Buschmann <sup>1,\*</sup>

<sup>1</sup> Division of Plastic Surgery and Hand Surgery, University Hospital Zurich, Sternwartstrasse 14, 8091 Zurich, Switzerland; julia.rieber@usz.ch, gabriella.meierbuergisser@usz.ch, iris.miescher@usz.ch, petra.wolint@usz.ch, maurizio.calcagni@usz.ch

<sup>2</sup> Oral Biotechnology & Bioengineering, Center for Dental Medicine, Cranio-Maxillofacial and Oral Surgery, University of Zurich, Zurich 8032, Switzerland; franz.weber@zzm.uzh.ch

<sup>3</sup> Department of Health Sciences & Technology & Department of Materials, Schmelzbergstrasse 9, LFO, 8092 Zürich, Switzerland; yang.yao@hest.ethz.ch

<sup>4</sup> University Clinic Balgrist, Orthopaedic Biomechanics, Forchstrasse 340, 8008 Zurich, Switzerland; esteban.ongini@hest.ethz.ch; jess.snedeker@hest.ethz.ch

<sup>5</sup> Laboratory of Thermodynamics in Emerging Technologies, Department of Mechanical and Process Engineering, ETH Zürich, 8092 Zürich, Switzerland; athanasios.milionis@lnt.iet.mavt.ethz.ch

\* Correspondence: johanna.buschmann@usz.ch, +41 44 255 98 95

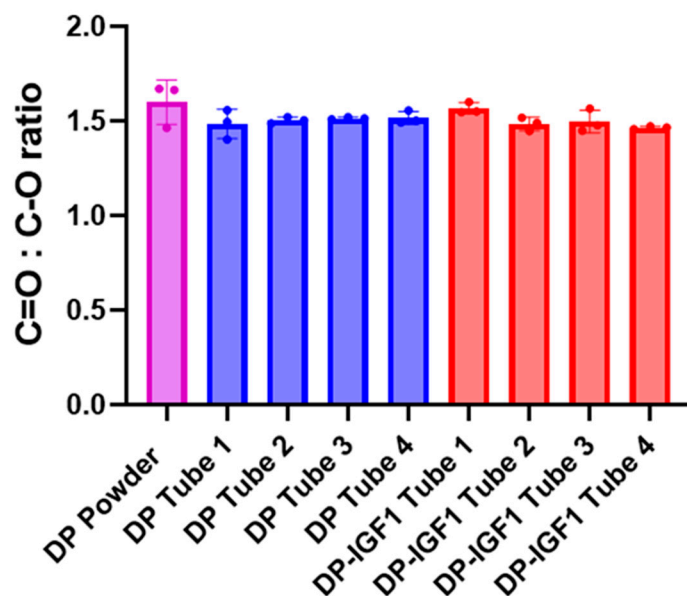

**Figure S1:** FTIR C=O to C-O band ratio assessed for DP powder, four pure DP tube and four DP tubes containing an emulsion electrospun layer with IGF-1. Data is shown as mean and SD with individual values, no significant difference in C=O : C-O ratio between individual tubes was detected with ANOVA.

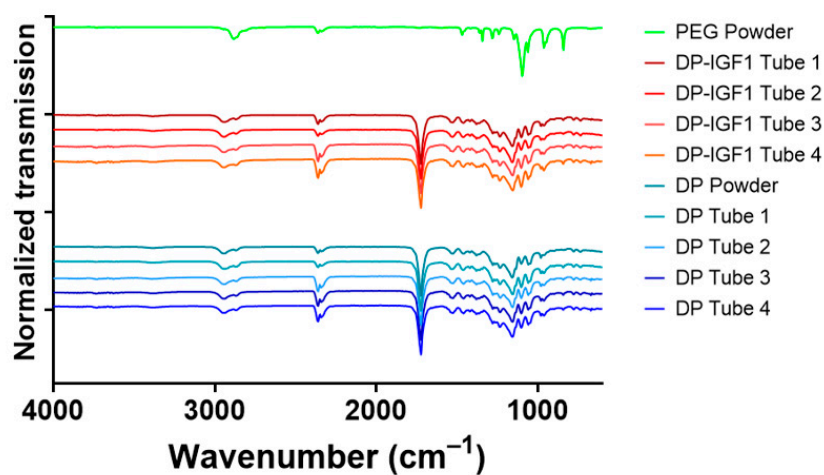

**Figure S2:** Further FTIR spectra, including the spectrum of pure PEG powder for comparison. For better comparability, the spectra are grouped in pure DP (bluish) and emulsion electrospun IGF-1 tubes (reddish).

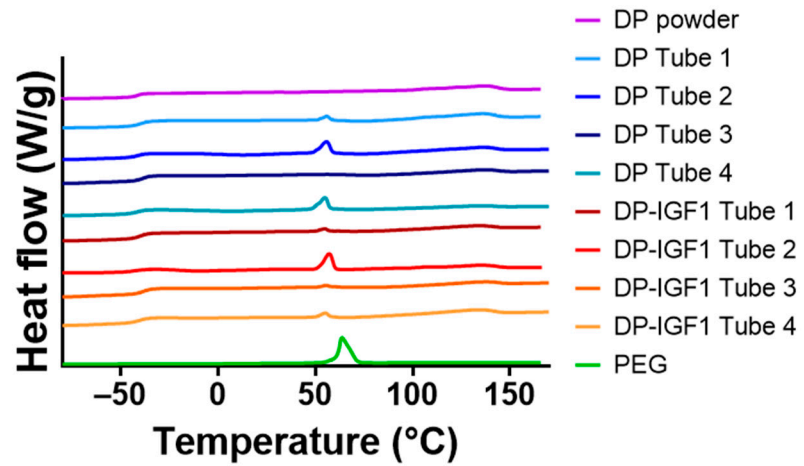

**Figure S3:** DSC measurements of DP and DP-IGF-1 tubes and pure PEG for comparison. For better comparability, the spectra are grouped in pure DP (bluish) and emulsion electrospun IGF-1 tubes (reddish).

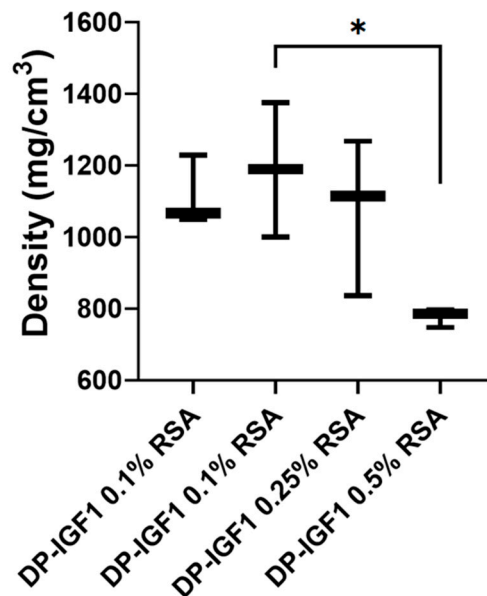

**Figure S4:** Density of electrospun meshes. Tubes 1 and 2 both had the same composition with 0.1 % RSA to stabilize IGF-1, while tube 3 included 0.25 % RSA and tube 4 0.5 % RSA, respectively. Data is shown as box and whisker plots with interquartile range and 95 % confidence interval. Significant difference between 0.1 % RSA tube 2 and 0.5 % RSA was found with one-way ANOVA. p-values < 0.05 were considered significant (\*).

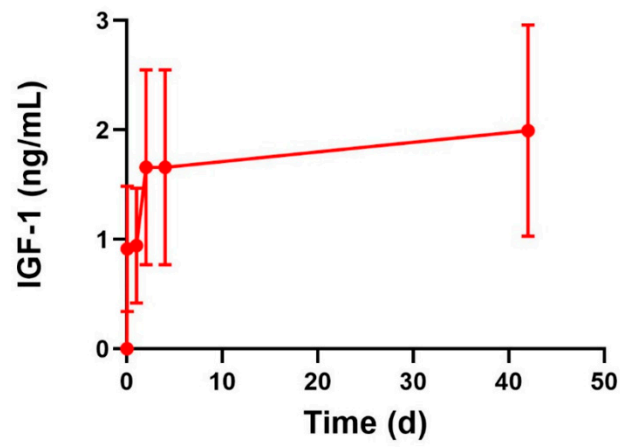

**Figure S5:** The IGF-1 release curve over 42 days. As can be seen, sustained release of IGF-1 up to 6 weeks can be achieved.

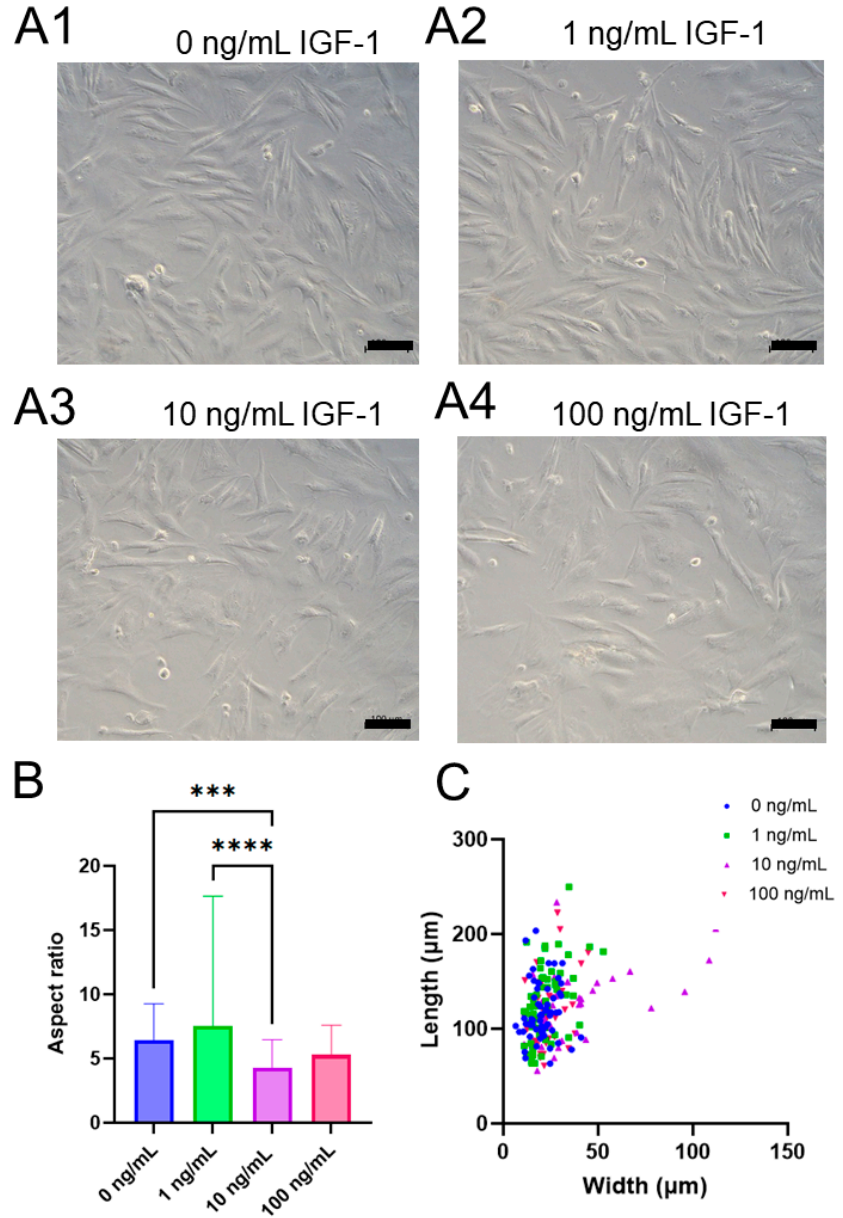

**Figure S6:** Aspect ratio. Rabbit Achilles tenocyte cell culture on day 3 after supplementation with IGF-1 at 1, 10 and 100 ng/mL, respectively, and control (0 ng/mL IGF-1). Microscopic images of respective conditions (**A1-A4**); aspect ratio (length: width) (**B**) and size distribution for the four conditions in a plot length versus width (**C**). p-values were considered significant if  $p < 0.05$ ; with  $p < 0.001$  (\*\*\*) and  $p < 0.0001$  (\*\*\*\*).
